# Supplementary material for: Efficacy, Safety, and Concerns on Microbiota Modulation, Antibiotics, Probiotics, and Fecal Microbial Transplant for Inflammatory Bowel Disease and Other Gastrointestinal Conditions: Results from an International Survey
Source: MDPI journal article supplement (doi:10.3390/microorganisms11112806), 2023-11-19
Supplement: s1 [file s1]

# **Project: Fecal microbial transplant and probiotics in the treatment of inflammatory bowel diseases - IBD Physicians survey**

## **Demographic of respondents**

- 1) Year of birth
- 2) Gender
  - a) Man
  - b) Woman
  - c) Other
  - d) I prefer not to disclose
- 3) In which country do you practice?
- 4) What is your specialty?
  - a) Trainee
  - b) Adult gastroenterologist specialist
  - c) Pediatric gastroenterologist specialist
  - d) Surgeon
  - e) Other
- 5) Where do you work?
  - a) University Hospital
  - b) Tertiary non-academic hospital
  - c) Secondary hospital
  - d) Private practice
  - e) Other
- 6) Years of experience in the field of IBD
  - a) Less than 1 year
  - b) Between 1 and 5 years
  - c) Between 5 and 10 years
  - d) More than 10 years
- 7) Number of IBD patients visited per year
  - a) Less than 100
  - b) Between 100 and 500
  - c) Between 500 and 1000
  - d) More than 1000

## **Knowledge of microbiota and its relevance to IBD**

- 8) What is your overall knowledge of microbiota
- a) Very limited
  - b) Limited
  - c) Medium
  - d) Quite knowledgeable
  - e) Expert
- 9) How relevant do you think microbiota is to the pathogenesis of IBD? (0 not relevant at all; 10 extremely relevant)
- 10) Do you use microbiota composition analysis in your practice?
- a) Regularly
  - b) Often
  - c) Occasionally
  - d) Never
- 11) If you don't use microbiota analyses, why? Multiple options possible
- a) No application to clinical practice
  - b) Not reimbursed by insurance/health care system
  - c) I wouldn't know how to interpret the results
  - d) Lack of reference values and high variability (inpatient and outpatients)
  - e) Other

### **Microbiota modulation**

- 12) For which indications do you prescribe probiotics? (0 never, 10 always)
- a) Ulcerative colitis
  - b) Crohn's disease
  - c) Pouchitis
  - d) After a gastrointestinal infection
  - e) Parallel to an antibiotic course for a non-gastrointestinal indication
  - f) Irritable bowel syndrome with constipation
  - g) Irritable bowel syndrome with diarrhea
- 13) Do you think antibiotics are useful/effective in inducing remission of IBD (excluding fistulas and abscess)?
- 14) Do you think antibiotics are useful/effective in maintaining remission of IBD (excluding fistulas and abscess)?
- 15) Do you think that certain antibiotics cause flares of IBD?

## **Fecal microbiota transplantation (FMT) in IBD**

17) How effective do you think FMT could be for the following conditions (0 never, 10 always)

- a) Ulcerative colitis
- b) Crohn's disease
- c) Pouchitis
- d) Irritable bowel syndrome with constipation
- e) Irritable bowel syndrome with diarrhea
- f) Other

18) How efficacious do you consider FMT compared to biologics/advanced small molecules?

- a) More effective than biologics/advanced small molecules
- b) As effective as advanced therapies
- c) Less effective than advanced therapies
- d) I don't know

19) How often do you think FMT should be repeated in patients with IBD to maintain remission?

- a) Once
- b) Weekly
- c) Monthly
- d) Every 2 months
- e) Every 6 months
- f) Yearly
- g) Not sure

20) Do you think that the FMT donor is relevant for the therapeutic success ("super donor concept")

- a) Yes
- b) No
- c) Not sure

21) Where would you place FMT in the treatment algorithm of IBD?

- a) First line treatment
- b) Second line (after a first line medication failed)
- c) After medical treatment and before surgery
- d) Don't know

22) If it was available and reimbursed would you consider using FMT in patients with IBD?

- a) Yes
- b) Only for very selected patients
- c) Not yet, I want to see more data
- d) No

e) Not sure

23) Would consider enrolling patients into clinical trials evaluating FMT for IBD?

- a) Yes
- b) No
- c) Not sure

24) Do you think FMT is safe?

- a) Yes
- b) No
- c) Undecided

25) What are your concerns about the use of FMT in IBD patients or why you would not refer a patient? (multiple answers possible)

- a) Sepsis/infection risk
- b) Risk of transmission of disease undetected by screening procedures
- c) Acceptability of treatment by patient
- d) Lack of evidence of efficacy
- e) Lacking clinical evidence to support its safety
- f) Absence of guidelines
- g) Administration and unpleasant nature of FMT
- h) Ethics
- i) Other

27) What are the most important factors to consider when deciding whether to recommend FMT as a treatment for IBD?

- a) Type of IBD (UC vs CD)
- b) Response to previous IBD treatment
- c) Disease severity
- d) Infectious risk
- e) Availability of other medical treatments

**Personal experience (targeted at direct experience)**

28) Have you previously performed FMT?

- a) Yes, personally
- b) No, but my center offer/perform FMT
- c) No, FMT is not performed in my center
- d) I have never heard of FMT before this survey

**IF NO → END OF SURVEY**

29) If yes, for which indication? (multiple answers possible)

- a) Crohn's disease
- b) Ulcerative colitis
- c) Irritable bowel syndrome
- d) Others

30) If yes, did you find FMT effective?

- a) Yes, very effective
- b) Yes, somewhat effective
- c) Neither beneficial nor detrimental
- d) Detrimental (it worsen the conditions)
- e) Not sure

31) If yes, did you find FMT easy to administer/organize?

- a) Yes
- b) No

32) If yes, which administration route did you use? Multiple options possible

- a) Oral tablets/capsules/Enteric coated capsules
- b) Nasogastric/duodenal tube
- c) Upper GI endoscopy
- d) Rectal enema
- e) Lower GI endoscopy
- f) Other

33) If performing FMT for IBD, are you combining it with other therapeutic interventions?

- a) No, alone
- b) With the going IBD treatment
- c) Probiotics
- d) Antibiotics
- e) Prebiotics
- f) Symbiotics
- g) Nutrition

34) In which disease phase you think FMT should be used?

- a) To induce remission
- b) To maintain remission
- c) Both

35) What aspect(s) of FMT are you less comfortable with? Several answers possible

- a) Indications (unclear evidence)
- b) Stool preparation
- c) Stool administration
- d) Safety
- e) Talking to patients about it

Thank you for your participation
